# Supplementary material for: A ZnO/N-doped carbon nanotube nanocomposite charge transport layer for high performance optoelectronics
Source: Royal Society of Chemistry journal article supplement (doi:10.1039/c2jm30710c), 2012-01-01
Supplement: c2jm30710c.pdf [file c2jm30710c.pdf]

## Electronic Supplementary Information (ESI)

### ZnO/N-Doped Carbon Nanotube Nanocomposites Charge Transport Layer for High Performance Optoelectronics

Ji Sun Park, Ju Min Lee, Sun Kak Hwang, Sun Hwa Lee, Hyun-Jung Lee, Bo Ram Lee, Hyeong Il Park, Ji-Seon Kim, Seunghyup Yoo, Myoung Hoon Song,\* and Sang Ouk Kim\*

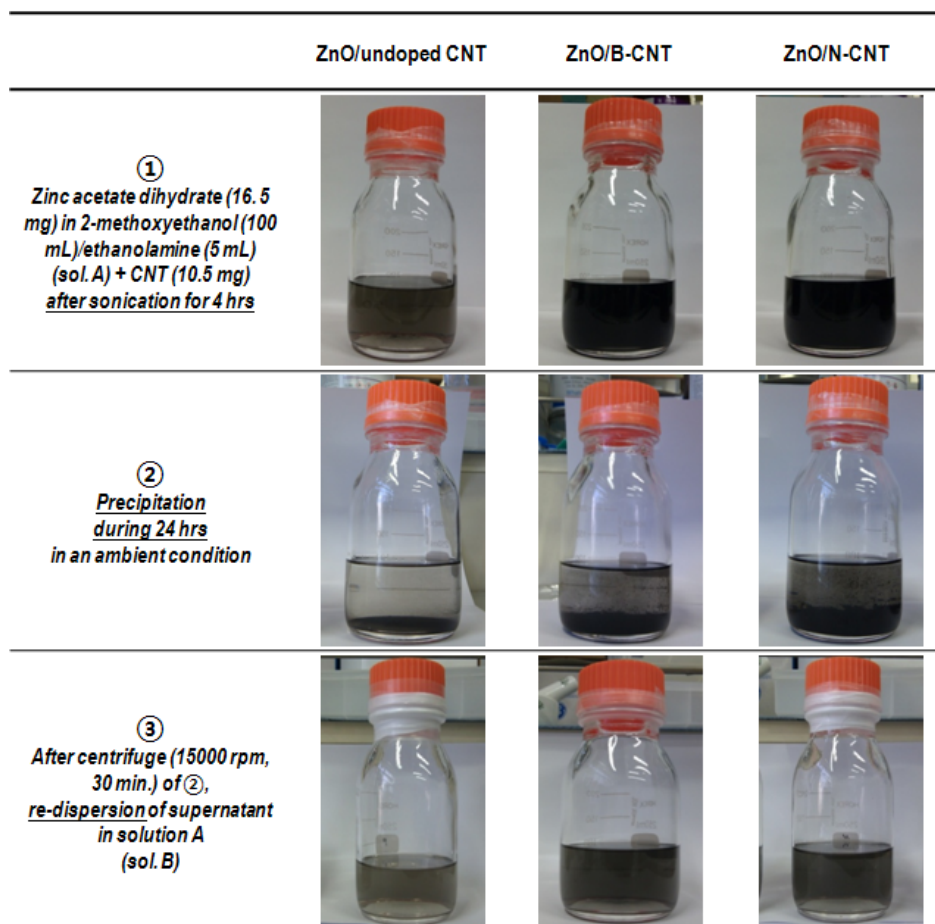

**Fig. S1** Preparation of homogeneously dispersed ZnO/CNT precursor solutions with undoped CNTs, B-CNTs, or N-CNTs.

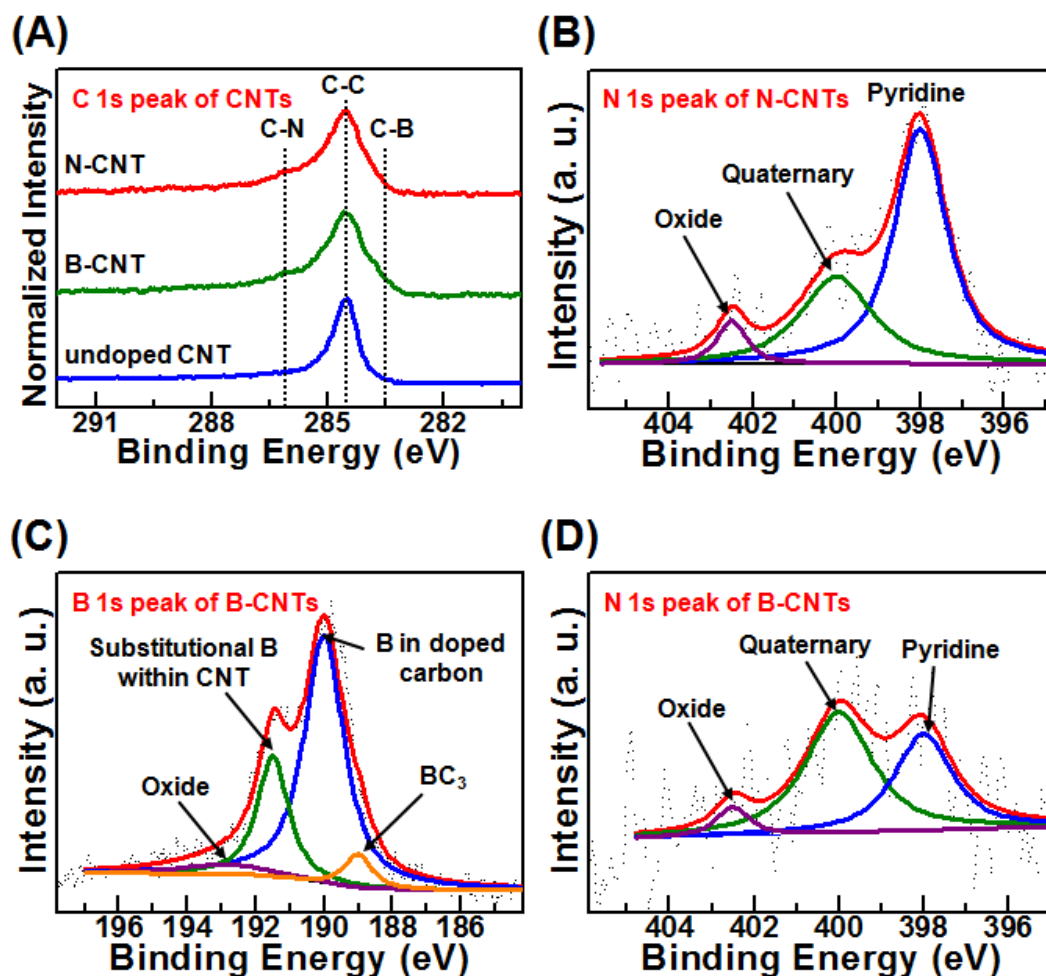

**Fig. S2** (A) X-ray photoelectron spectroscopy (XPS) analysis of normalized C1s peaks (284.5 eV) for B-CNT, and N-CNT. C1s peak of B-CNT shows shoulder peaks at 283.5 and 286.8 eV, which originated from C-B bonding and C-N bonding respectively. C1s peak of N-CNT shows a shoulder peak at 286.8 eV due to the C-N bonding. (B) N1s XPS peak of N-CNT. Nitrogen atoms in CNT existed as quaternary nitrogen (400.8 eV), pyridinic nitrogen (398 eV), and nitrogen oxide (402.5 eV). (C) B1s XPS peak of B-CNT. Boron atoms in CNT existed as quaternary boron (191.5 eV), pyridinic boron (190 eV), BC<sub>3</sub> (189 eV), and boron oxide (192.8 eV). (D) N1s XPS peak of B-CNT. Nitrogen atoms in CNT existed as quaternary nitrogen (400.8 eV), pyridinic nitrogen (398 eV), and nitrogen oxide peak (402.5 eV).

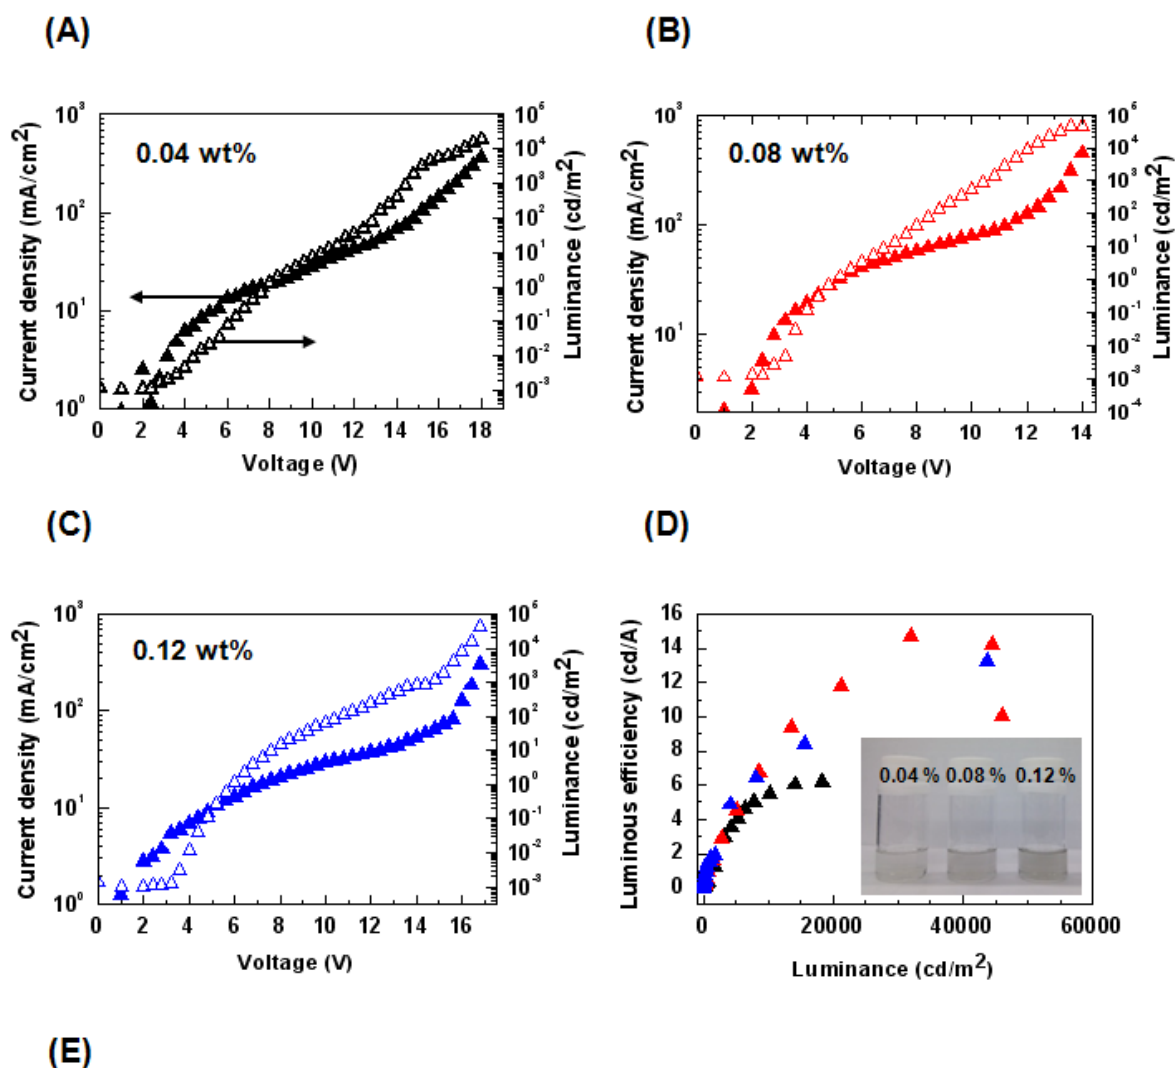

| Device Configuration | L <sub>max</sub> (cd/m <sup>2</sup> )<br>@ bias | LE <sub>max</sub> (cd/A)<br>@ bias | LE <sub>max</sub> (lm/W)<br>@ bias | EQE <sub>max</sub> (%)<br>@ bias |
|----------------------|-------------------------------------------------|------------------------------------|------------------------------------|----------------------------------|
| ZnO/N-CNT (0.04 %)   | 18,300 (@ 18.0 v)                               | 6.2 (@ 18.0 v)                     | 1.1 (@ 18.0 v)                     | 1.9 (@ 18.0 v)                   |
| ZnO/N-CNT (0.08 %)   | 46,100 (@ 14.0 V)                               | 14.3 (@ 13.6 V)                    | 3.5 (@ 13.2 V)                     | 4.3 (@ 13.2 V)                   |
| ZnO/N-CNT (0.12 %)   | 43,750 (@ 16.8 V)                               | 13.2 (@ 16.8 V)                    | 2.5 (@ 16.8 V)                     | 3.9 (@ 16.8 V)                   |

**Fig. S3** Light-emitting characteristics of OLEDs with various concentrations of N-CNTs in ZnO layer. (A) 0.04 wt%, (B) 0.08 wt%, and (C) 0.12 wt%. (D)  $\eta_{EL}$ -V characteristics (inset: photographs of homogeneously dispersed ZnO/N-CNT precursor solutions). (E) Detailed device performance parameters. FTO cathode and MoO<sub>3</sub> deposited Au anode are commonly used for all devices.

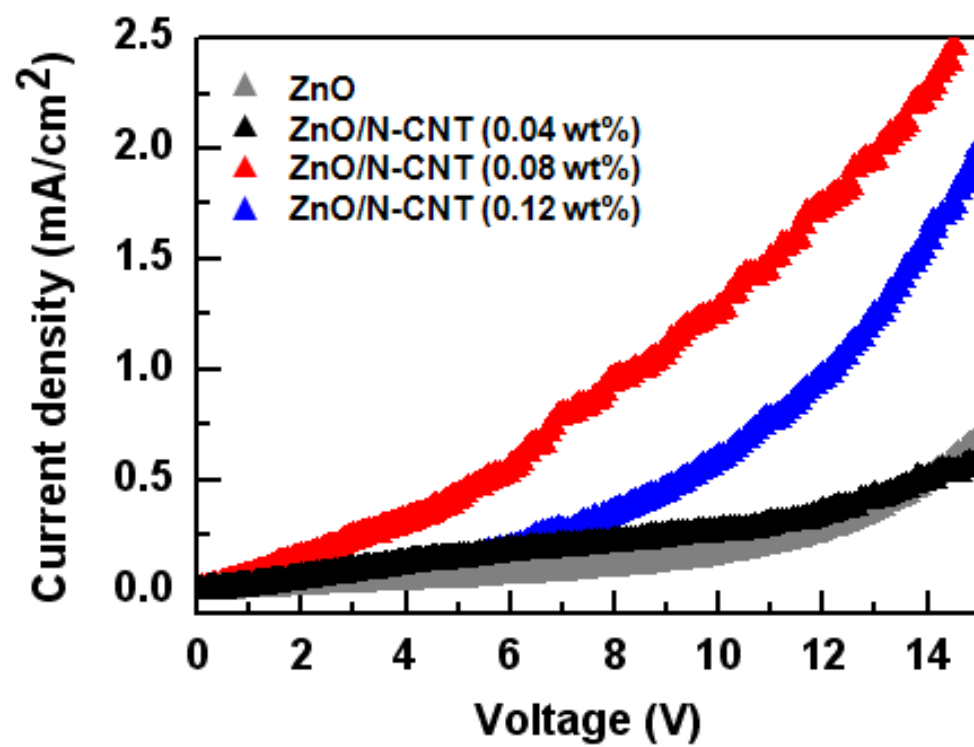

**Fig. S4** *J-V* characteristics of electron-only devices (FTO / (ZnO/CNT) / CS<sub>2</sub>CO<sub>3</sub> / F8BT / Ca / Al) with various concentrations of N-CNTs (0.04, 0.08 and 0.12 wt%) in ZnO layer.

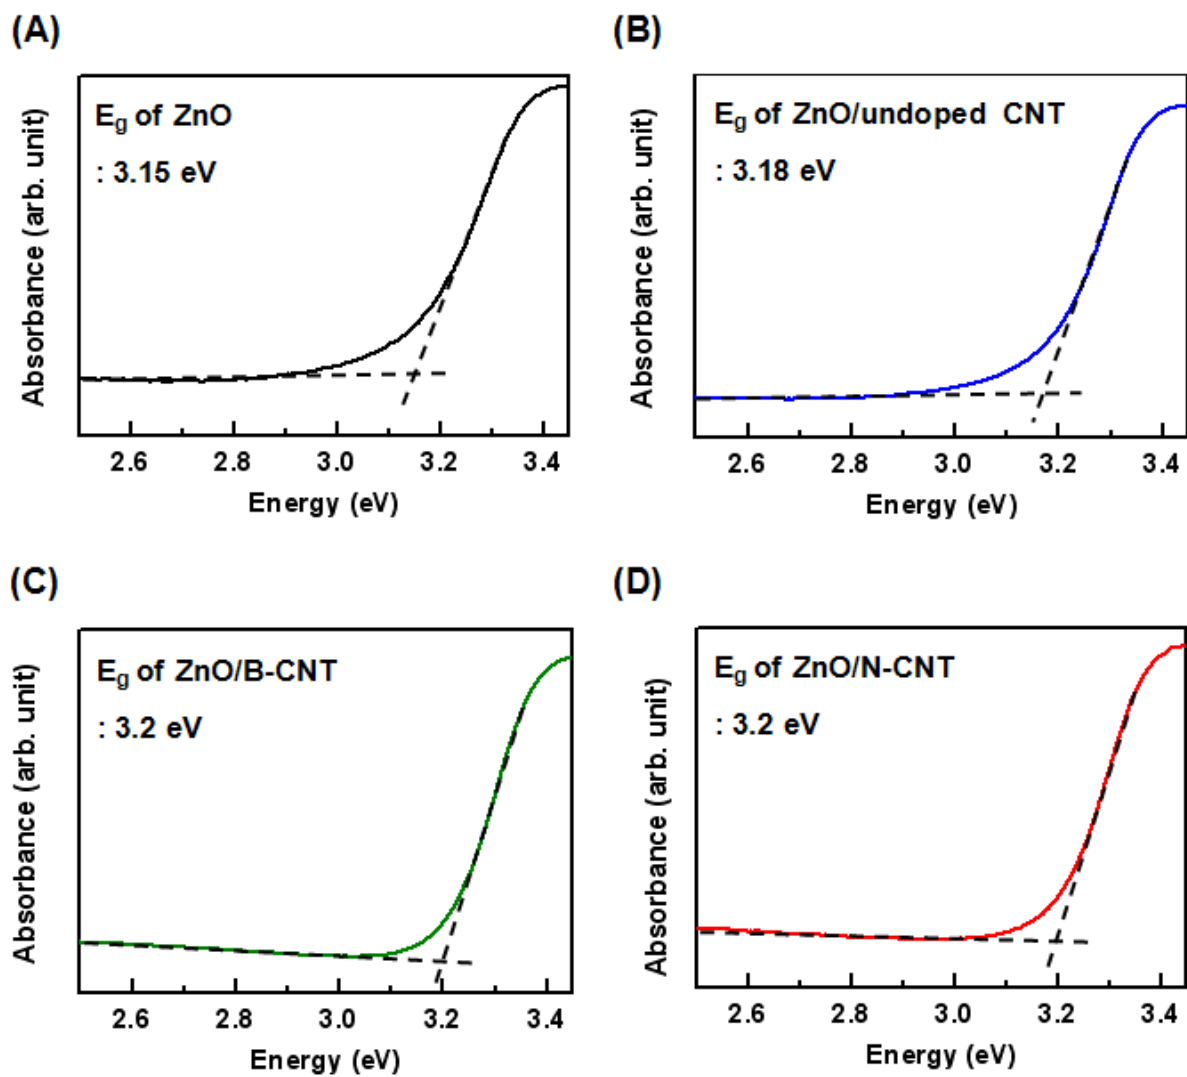

**Fig. S5** Bandgap energy of ZnO/CNT nanocomposite layers obtained from the UV-VIS absorption spectrum. (A) ZnO, (B) ZnO/undoped CNT, (C) ZnO/B-CNT, and (D) ZnO/N-CNT layers.

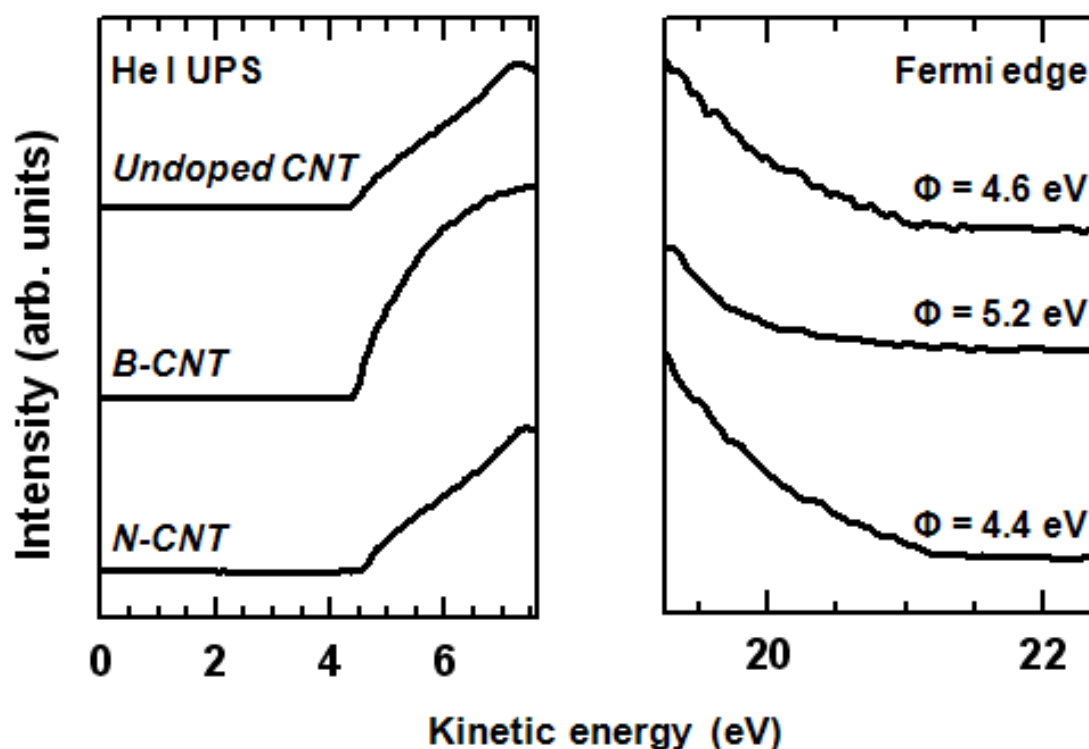

**Fig. S6.** Work function measurement of undoped CNT, B-CNT, and N-CNT by ultraviolet photoelectron spectroscopy (UPS, AXIS-NOVA, Kratos Inc.). The samples were prepared by drop-casting CNT films on 70-nm-thick gold coated silicon substrates. The work functions could be obtained from the difference between the inelastic cutoff (4.6 eV for CNTs) and the Fermi edge (21.2 eV for CNTs).<sup>1</sup> The work function of pristine CNTs was  $\Phi = 21.2 \text{ eV} - (21.2 \text{ eV} - 4.6 \text{ eV}) = 4.6 \text{ eV}$ . Since Boron has only three valence electrons (1 less than carbon), the B-doping decreases the  $\pi$  electrons of CNTs and, thus, significantly increases the work function down to 5.2 eV. In contrast, the work function of N-CNTs slightly decreased down to 4.4 eV, due to the additional  $\pi$  electrons from the doped nitrogen atoms.

#### Reference

- 1 Y. Park, V. Choong, Y. Gao, B. R. Hsieh, and C. W. Tang, *Appl. Phys. Lett.*, 1996, **68**, 2699.
